# Supplementary material for: ZnS nanowall coated Ni composites: facile preparation and enhanced electromagnetic wave absorption
Source: Royal Society of Chemistry journal article supplement (doi:10.1039/c4ra08095e), 2014-01-01
Supplement: c4ra08095e1.pdf [file c4ra08095e1.pdf]

## ZnS nanowall coated Ni composites: facile preparation and enhanced electromagnetic wave absorption

Biao Zhao <sup>a</sup>, Gang Shao <sup>a</sup>, Bingbing Fan <sup>a</sup>, Wanyu Zhao <sup>a</sup>, Yajun Xie <sup>a</sup>, Rui Zhang <sup>a,b\*</sup>

<sup>a</sup> School of Materials Science and Engineering, Zhengzhou University, Zhengzhou, Henan 450001, PR China

<sup>b</sup> Zhengzhou Aeronautical Institute of Industry Management, Zhengzhou, Henan 450046, PR China

\* Corresponding Author.

Prof. Rui Zhang

Tel: +86-371-60632007

Fax: +86-371-60632600

E-mail address: [zhangray@zzu.edu.cn](mailto:zhangray@zzu.edu.cn).

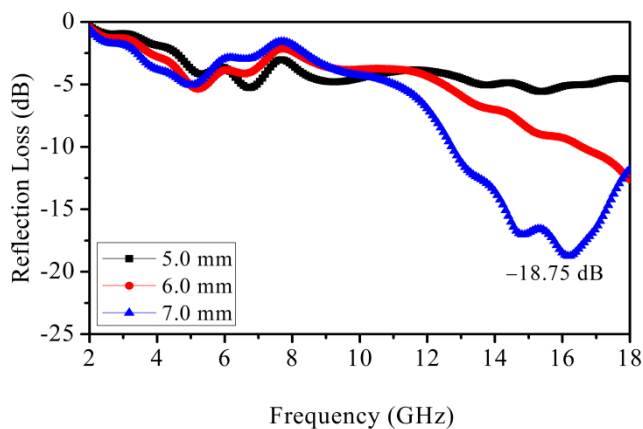

Fig.S1. The reflection loss of Ni@ZnS paraffin-composite at different thicknesses (5mm, 6mm, 7mm) in the frequency range of 2-18 GHz

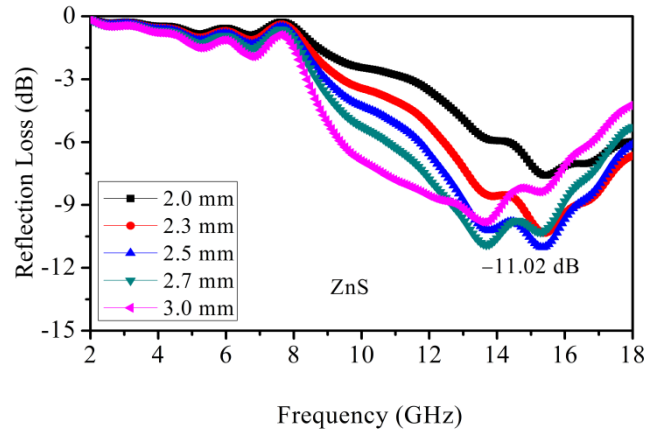

Fig.S2. Reflection loss curves of 70wt% ZnS paraffin-composite at various thicknesses in the frequency of 2-18 GHz.
